## Edible Fruit Plant Species in the Amazon Forest Rely Mostly on Bees and Beetles as Pollinators

Fabricia Sousa Paz,<sup>1,2</sup> Carlos Eduardo Pinto,<sup>1</sup> Rafael Melo de Brito,<sup>1</sup>  
Vera Lucia Imperatriz-Fonseca,<sup>3</sup> and Tereza Cristina Giannini<sup>1,4,5,\*</sup>

<sup>1</sup>Instituto Tecnológico Vale. Rua Boaventura da Silva 955. Belém, Pará, Brazil, <sup>2</sup>Centro de Ciências Naturais e Tecnologia, Universidade do Estado do Pará. Rua do Una 156. Belém, Pará, Brazil, <sup>3</sup>Departamento de Ecologia, Universidade de São Paulo. Rua do Matão, trav. 14. São Paulo, São Paulo, Brazil, <sup>4</sup>Ciências Biológicas, Universidade Federal do Pará. R. Augusto Corrêa, 1. Belém, Pará, Brazil, and <sup>5</sup>Corresponding author, e-mail: [tereza.giannini@itv.org](mailto:tereza.giannini@itv.org)

Subject Editor: James Strange

Received 23 June 2020; Editorial decision 14 November 2020

### Abstract

Edible fruit plants of tropical forests are important for the subsistence of traditional communities. Understanding the most important pollinators related to fruit and seed production of these plants is a necessary step to protect their pollination service and assure the food security of these communities. However, there are many important knowledge gaps related to floral biology and pollination in megadiverse tropical rainforests, such as the Amazon Forest, due mainly to the high number of plant species. Our study aims to indicate the main pollinators of edible plants (mainly fruits) of the Amazon forest. For this, we adopted a threefold strategy: we built a list of edible plant species, determined the pollination syndrome of each species, and performed a review on the scientific literature searching for their pollinator/visitors. The list of plant species was determined from two specialized publications on Amazon fruit plants, totaling 188 species. The pollination syndrome was determined for 161 species. The syndromes most frequently found among the analyzed species were melittophily (bee pollination), which was found in 101 of the analyzed plant species (54%) and cantharophily (beetle pollination; 26 species; 14%). We also found 238 pollinator/visitor taxa quoted for 52 (28%) plant species in previous publications, with 124 taxa belonging to Apidae family (bees; 52%), mainly from Meliponini tribe (58 taxa; 47%). Knowledge about pollinators is an important step to help on preserving their ecosystem services and maintaining the productivity of fruit trees in the Amazon.

### Graphical Abstract

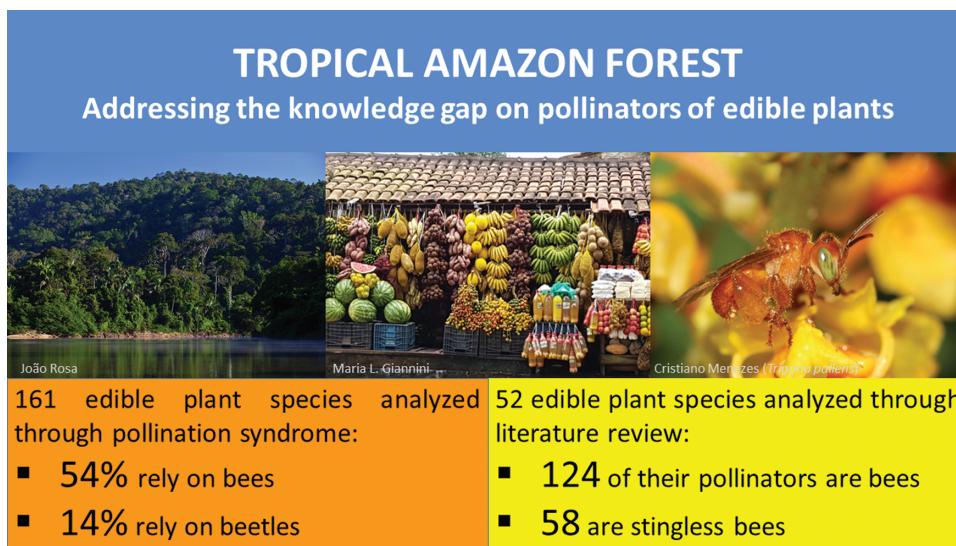

**Key words:** food production, ecosystem service, bee, traditional community, sustainability

Brazil holds the largest area covered by tropical forests in the world, and these forests are predominantly in the Amazon biome, which is home to 7,000 to 16,000 species of trees (Gomes et al. 2019). It was proposed that near 220 edible fruit-bearing plants are found only in the Amazon, corresponding to almost 50% of all fruits listed to Brazil (roughly 500 species) (Giacometti 1993). These plant species are important to the subsistence of traditional populations, which is largely based on nature-based systems characterized by small production and manual collection of food (Pinton and Emperaire 2004). However, many of the plants used by indigenous peoples and local communities in the Amazon are still poorly understood regarding their basic biology and their contribution to human well-being (Clement et al. 1982).

Most plant species require animal pollination for fruit and seed production (Ollerton et al. 2011), especially in tropical habitats, where a large number of angiosperms and a wide diversity of pollinators with specific pollination mechanisms are found (Machado and Lopes 2008). Pollination has been extensively studied because of its importance as nature's contribution to people (NCP) (Diaz et al. 2018) and its utility for sustainable agriculture (Garibaldi et al. 2016) and to the maintenance of biocultural values (Hill et al. 2019). According to the Food and Agricultural Organization (FAO) data, 33% of human food depends to some degree on cultivated species, which are most frequently pollinated by bees (Klein et al. 2007). Costanza et al. (1997) carried out the first global assessment of the value of pollination (US\$117 billion). This value was later updated (Costanza et al. 2014) and a recent review estimated the total annual value of crop pollination as corresponding to \$235–\$577 billion (in 2015, U.S. dollars) (IPBES 2016). For Brazil, Giannini et al. (2015a) showed that agricultural pollination had an annual value of US\$12 billion (in 2013). For Pará, the second largest state of Brazil and entirely within the Amazon forest biome, the annual value of agricultural pollination (in 2016) corresponds to US\$983 million (Borges et al. 2020). In addition, for some crops, flower visitors promote enhancement of fruit quality, which is an indirect benefit of extreme importance for agricultural production, increasing its market value (Giannini et al. 2015a).

Globally, bees are the main pollinators of agricultural crops (Potts 2016). From those, the importance of highly social species such as *Apis mellifera* Linnaeus, 1758 (Hymenoptera: Apidae) (Potts et al. 2016) and stingless bees (Meliponini tribe) (Slaa et al. 2006; Giannini et al. 2015b, 2020a) is well recognized. Recent data on 23 Brazilian crops showed that 144 bee species were quoted as crop pollinators; from those, social bees comprised 63 species (44%), being *Trigona* Jurine, 1807 (Hymenoptera: Apidae) and *Melipona* Illiger, 1806 (Hymenoptera: Apidae) two important genera with the highest number of species quoted (Giannini et al. 2020a).

Pollinator declines have been reported since the mid-20th century (Carson 1962, Buchmann and Nabhan 1997), and nowadays, it is clear that multiple factors can affect pollinators, mainly habitat loss, pathogens, pesticides, and climate change (Potts et al. 2010, 2016). This decline poses an important challenge for global food production (Potts et al. 2016). For Brazil, a previous study showed that the projected climate change will potentially reduce the probability of pollinator occurrence by almost 0.13 by 2050 (Giannini et al. 2017). Considering bees occurring in the Eastern Amazon, recent projections suggested a potential reduction in pollination services, especially regarding crop pollination (Giannini et al.

2020b). However, a supplementary and equally important concern is the lack of knowledge related to insects (Montgomery et al. 2020), especially in tropical areas.

Pollination data from megadiverse tropical forest habitats, such as the Amazon forest, are still scarce (Giannini et al. 2015b, Borges et al. 2020), which represents a challenge to understand crop production and anticipate the potential threat of crop pollinator deficits due to global change. This knowledge gap is critical, especially considering the rapid ongoing degradation in the Amazon forest (Nobre et al. 2016, Paiva et al. 2020), and the high number of species, and the difficulties to conduct field surveys. When analyzing large numbers of tropical plant species, studies on pollination syndromes can be useful, aiming to address the group of pollinators that is the most important for each plant species. Floral characteristics can select floral visitors that have a suitable morphology and behavior, maximizing their chance of acting as pollinators (Stang et al. 2006); those characteristics define the pollination syndrome (Fenster et al. 2004). In the last decade, studies have shown that floral morphology is an important factor in structuring pollination interactions (e.g., Stang et al. 2006, Dalsgaard et al. 2008), since floral structures are adapted to enhance efficiency of pollen vectors (Proctor et al. 1996). In spite of the generalized nature of plant-pollinator interaction (Waser et al. 1996), the pollination syndrome concept was successfully applied to assess the main pollinators in a large number of South African plant species (Johnson and Wester 2017), and in Brazilian tropical forests (Machado and Lopes 2004, Girão et al. 2007), as well seasonal forests (Kinoshita et al. 2006). It was also applied to monitoring restoration (Martins and Antonini 2016), and defining the influence of abiotic factors on flowering phenology (Cortés-Flores et al. 2017). However, determining one specific pollinator taxon, or a set of taxa, is an additional challenge, which can be addressed through a review on scientific literature considering each focused plant species.

Our objective was to indicate the main pollinators of edible plants (mainly fruit trees) of the Brazilian Amazon Tropical Forest. For this, we first built a list of Amazon fruit trees and then determined the pollination syndrome for each species. We also conducted a literature survey to determine whether any specific pollinator/visitor species was previously quoted for each plant species listed.

## Materials and Methods

The list of plant species used in our study was produced from specialized literature on Amazon fruit tree species, and includes the seminal publications of Cavalcante (1996) and Silva (2011), which listed the plants consumed by traditional communities in this biome.

We determined the pollination syndrome of each plant species based on characteristics suggested by Faegri and van der Pijl (1979) and Rosas-Guerrero et al. (2014) (Table 1). The information used to identify the pollination syndromes was based on images available for each plant species, virtual herbaria sources, articles on reproductive and flowering biology, and books that address the region's flora. Additional details were also obtained, such as the flowering period of each plant species (phenology), plant habit, potential ethnobotanical uses for local Amazon communities, and if species are exotic or native on Brazil.

A survey of previous publications that reported visitors or effective pollinators of plant species quoted here was also conducted. We searched in the Scopus database the scientific name of each plant

**Table 1.** Pollination syndromes and their characteristics (modified from Faegri and van der Pijl 1979 and Rosas-Guerrero et al. 2014).

| Pollination syndrome                             | Aperture              | Color                                | Odor strength / type                      | Shape                             | Orientation                                   | Size / symmetry                             | Nectar guide / sexual organ         | Reward                                      |
|--------------------------------------------------|-----------------------|--------------------------------------|-------------------------------------------|-----------------------------------|-----------------------------------------------|---------------------------------------------|-------------------------------------|---------------------------------------------|
| Anemophily / wind                                | Diurnal;<br>nocturnal | Green whitish                        | Imperceptible                             | Brush                             | Upright                                       | Amorpho                                     | Absent                              | Absent                                      |
| Cantharophilily /beetles                         | Diurnal;<br>nocturnal | Brown; green;<br>white               | Strong /fruity; musky                     | Dish                              | Horizontal; upright                           | Large /radial                               | Absent/exposed                      | Food tissue;<br>heat; nectar;<br>pollen     |
| Entomophilily / insect                           | Diurnal;<br>nocturnal | Bright colors                        |                                           |                                   |                                               |                                             |                                     | Nectar; pollen                              |
| Phalaenophilily / moths                          | Nocturnal             | White                                | Moderate; strong / sweet                  | Bell; brush; tubo                 | Horizontal; pendent /<br>upright              | Medium; large; huge<br>/ radial             | Absent/ closed                      | Nectar                                      |
| Melittophilily /bees                             | Diurnal               | Blue; pink; purple;<br>white; yellow | Imperceptible; weak /<br>fresh; sweet     | Bell; dish; tubo;<br>flag; gullet | Horizontal; pendent;<br>upright               | Small; medium; large<br>/ bilateral; radial | Absent; present/<br>closed; exposed | Fragrance;<br>nectar; oil;<br>pollen; resin |
| Myophilily / flies                               | Diurnal               | Brown; green;<br>white; yellow       | Imperceptible; weak /<br>fruity; sour     | Bell; dish                        | Horizontal; upright                           | Small / radial                              | Absent; present /<br>exposed        | Nectar; pollen                              |
| Ornithophilily / hummingbirds                    | Diurnal               | Orange; pink; red;<br>yellow         | Imperceptible                             | Brush; tubo;<br>flag; gullet      | Horizontal; pendent;<br>upright               | Medium; large / bi-<br>lateral; radial      | Absent/exposed                      | Nectar                                      |
| Psychophilily / butterflies and<br>diurnal moths | Diurnal               | Blue; orange; pink;<br>red; yellow   | Weak / fresh                              | Bell; brush; tube                 | Horizontal; upright                           | Small; medium; large<br>/ radial            | Absent; present /<br>closed         | Nectar                                      |
| Chiropterophilily / bats                         | Nocturnal             | Dark red; green;<br>white            | Moderate; strong /<br>fruity; musky; sour | Bell; brush; dish;<br>gullet      | Horizontal; pendent;<br>upright; (far ground) | Large; huge / bilat-<br>eral; radial        | Absent/exposed                      | Food tissue;<br>nectar; pollen              |

The entomophily syndrome is formed by a set of characteristics that characterize flowers attractive to several insects, and it is not possible to determine a particular insect group.

species listed combined with ‘pollination’ OR ‘pollinator’ OR ‘visitor’. As our aim was to identify potential pollinators occurring on Amazon associated to each of the listed plant, we considered only studies conducted in the Amazon biome. If any pollinator/visitor species was quoted in the reference, we inserted this information on our database.

Taxonomy classification for plants and bees followed two Brazilian biodiversity repositories. For plant species, we used Flora do Brasil (<http://floradobrasil.jbrj.gov.br/>) and for bee species we used Catálogo de Abelhas Moure (<http://moure.cria.org.br/>; classification according to Moure et al. 2007).

## Results

We compiled a list of 188 species (Table 2). These species belong to 44 botanical families, and the families Arecaceae and Sapotaceae were the most frequent, with 22 and 16 species, respectively. Most species are trees (148 species; 79%). Among the 188 species, 147 species are native to Brazil and 41 species are exotic. Of the total number of species of fruit plants listed, we determined the pollination syndrome for 161 species; we could not find information for the remaining species (27 species; 14%).

Plant species analyzed (161 species) were classified as having animal pollination syndromes, meaning that they do not exhibit characteristics of wind or water pollination (anemophily and hydrophily, respectively). Most of the studied plants (101 species; 54%) were classified as having a melittophily syndrome (characteristics related to the attraction of bees) (Fig. 1). The other most frequent syndromes were cantharophily (beetles), which was identified for 26 species (14%); chiropterophily (bats), which was identified for 14 species (7%); and phalenophily (moths), which was identified for 13 plant species (7%). These four syndromes represented 82% of all plants analyzed. Considering all insects quoted (bees, beetles, moths, and flies), the total percentage is equal to 78%. Additional information on the flowering period could not be obtained for 56 plant species. A short flowering period was found for 26 species (maximum 2 mo). The other species (106 species) had a flowering period of 3 mo or more (Supp Information 1 [online only]).

Studies conducted by other authors provided data on animal visitors or pollinators for 52 analyzed plant species, accounting for 28% of the total. These studies quoted 238 animal taxa (Supp Information 1 [online only]), of which 124 were bees of the Apidae family (58 Meliponini tribe; 20 species of *Centris* Fabricius, 1804 (Hymenoptera: Apidae)) (Table 3), 62 Coleoptera, 42 Diptera, four Lepidoptera, one Hemiptera, one Neuroptera and

**Table 2.** Pollination syndrome of edible plants from Brazilian Amazon

| Family          | Scientific name                                               | Brazilian vernacular name | Syndrome      |
|-----------------|---------------------------------------------------------------|---------------------------|---------------|
| Arecaceae       | 1. <i>Acrocomia sclerocarpa</i> Mart.                         | Mucajá                    | Undefined     |
| Opilinaeae      | 2. <i>Agonandra brasiliensis</i> Miers ex Benth & Hook. F.    | Agonandra                 | Undefined     |
| Arecaceae       | 3. <i>Aiphanes aculeata</i> Willd.                            | Cariota-de-espino         | Cantharophily |
| Rubiaceae       | 4. <i>Alibertia edulis</i> (Rich.) Rich. Ex DC.               | Puruí                     | Phalenophily  |
| Lecitidaceae    | 5. <i>Allantoma lineata</i> (Mart. & Berg) Miers              | Ceru                      | Mellitophily  |
| Apocynaceae     | 6. <i>Ambelania acida</i> Aubl.                               | Papino-do-Mato            | Phalenophily  |
| Anacardiaceae   | 7. <i>Anacardium giganteum</i> Hanc. Ex Engl.                 | Cajuí                     | Mellitophily  |
| Anacardiaceae   | 8. <i>Anacardium humile</i> A. St.-Hil                        | Cajuzinho-do-campo        | Mellitophily  |
| Anacardiaceae   | 9. <i>Anacardium microcarpum</i> Ducke                        | Caju-do-Campo             | Mellitophily  |
| Anacardiaceae   | 10. <i>Anacardium negrense</i> Pires & Froés ex Black & Pires | Cajutim                   | Mellitophily  |
| Anacardiaceae   | 11. <i>Anacardium occidentale</i> L.                          | Caju                      | Mellitophily  |
| Bromeliaceae    | 12. <i>Ananas comosus</i> (L.) Merrill                        | Abacaxi                   | Ornithophily  |
| Annonaceae      | 13. <i>Annona crassiflora</i> Mart.                           | Araticum-do-cerrado       | Cantharophily |
| Annonaceae      | 14. <i>Annona densicoma</i> Mart.                             | Araticum-do-Mato          | Cantharophily |
| Annonaceae      | 15. <i>Annona montana</i> Macf.                               | Araticum                  | Cantharophily |
| Annonaceae      | 16. <i>Annona muricata</i> L.                                 | Graviola                  | Cantharophily |
| Annonaceae      | 17. <i>Annona squamosa</i> L.                                 | Ata                       | Cantharophily |
| Leguminosae     | 18. <i>Arachis hypogaea</i> L.                                | Amendoim                  | Mellitophily  |
| Myrsinaceae     | 19. <i>Ardisia panurensis</i> Mez                             | Cururureçá                | Mellitophily  |
| Moraceae        | 20. <i>Artocarpus altilis</i> (S. Parkinson) Fosb.            | Fruta-Pão                 | Mellitophily  |
| Moraceae        | 21. <i>Artocarpus heterophyllus</i> Lam.                      | Jaca                      | Cantharophily |
| Arecaceae       | 22. <i>Astrocaryum aculeatum</i> G. Mey.                      | Tucumã-do-Amazonas        | Undefined     |
| Arecaceae       | 23. <i>Astrocaryum jauari</i> Mart.                           | Jauari                    | Undefined     |
| Arecaceae       | 24. <i>Astrocaryum murumuru</i> Mart.                         | Murumuru                  | Undefined     |
| Arecaceae       | 25. <i>Astrocaryum vulgare</i> Mart.                          | Tucumã-do-Pará            | Cantharophily |
| Oxalidaceae     | 26. <i>Averrhoa bilimbi</i> L.                                | Limão-de-Caiana           | Mellitophily  |
| Oxalidaceae     | 27. <i>Averrhoa carambola</i> L.                              | Carambola                 | Mellitophily  |
| Arecaceae       | 28. <i>Bactris gasipaes</i> Kunth                             | Pupunha                   | Cantharophily |
| Arecaceae       | 29. <i>Bactris maraja</i> Mart.                               | Marajá                    | Cantharophily |
| Moraceae        | 30. <i>Bagassa guianensis</i> Aubl.                           | Tatajuba                  | Mellitophily  |
| Melastomataceae | 31. <i>Bellucia grossularioides</i> (L.) Triana               | Araçá-de-Anta             | Mellitophily  |
| Lecitidaceae    | 32. <i>Bertholletia excelsa</i> Bonpland                      | Castanha-do-Pará          | Mellitophily  |
| Bixaceae        | 33. <i>Bixa orellana</i> L.                                   | Urucum                    | Mellitophily  |
| Malvaceae       | 34. <i>Bombacopsis glaba</i> (Pasquale) Robyns                | Castanha-do-maranhão      | Mellitophily  |
| Apocynaceae     | 35. <i>Bonafousia longituba</i> Markgr.                       | Paiuetu                   | Phalenophily  |
| Rubiaceae       | 36. <i>Borojoa sorbilis</i> (Ducke) Cuatr.                    | Puruí-Grande              | Phalenophily  |
| Malpighiaceae   | 37. <i>Bunchosia armeniaca</i> (Cav.) DC                      | Caferana                  | Mellitophily  |

Table 2. Continued

| Family          | Scientific name                                          | Brazilian vernacular name | Syndrome        |
|-----------------|----------------------------------------------------------|---------------------------|-----------------|
| Malpighiaceae   | 38. <i>Byrsonima amazonica</i> Griseb.                   | Muruci-Vermelho           | Mellitophily    |
| Malpighiaceae   | 39. <i>Byrsonima crassifolia</i> (L.) Rich.              | Muruci                    | Mellitophily    |
| Malpighiaceae   | 40. <i>Byrsonima crispa</i> Jussieu                      | Muruci-da-Mata            | Mellitophily    |
| Malpighiaceae   | 41. <i>Byrsonima lancifolia</i> Jussieu                  | Muruci-da-Capoeira        | Mellitophily    |
| Malpighiaceae   | 42. <i>Byrsonima verbascifolia</i> (L.) Rich. Ex Jussieu | Muruci-Rasteiro           | Mellitophily    |
| Myrtaceae       | 43. <i>Campomanesia lineatifolia</i> Ruiz & Pavon        | Guabiraba                 | Mellitophily    |
| Caryocaceae     | 44. <i>Carica papaya</i> L.                              | Mamão                     | Phalenophily    |
| Caryocaraceae   | 45. <i>Caryocar brasiliense</i> Camb.                    | Pequi                     | Chiropterophily |
| Caryocaceae     | 46. <i>Caryocar villosum</i> (Aubl.) Pers.               | Piquiá                    | Chiropterophily |
| Euforbiaceae    | 47. <i>Caryodendron amazonicum</i> Ducke                 | Castanha-de-Porco         | Undefined       |
| Leguminosae     | 48. <i>Cassia leiandra</i> Benth.                        | Marimari                  | Mellitophily    |
| Hippocrateaceae | 49. <i>Cheilochlinium cognatum</i> (Miers) A.C. Smith    | Uarutama                  | Mellitophily    |
| Crisobalanaceae | 50. <i>Chrysobalanus icaco</i> L.                        | Ajuru                     | Mellitophily    |
| Sapotaceae      | 51. <i>Chrysophyllum cainito</i> L.                      | Camitié                   | Myophily        |
| Curcubitaceae   | 52. <i>Citrullus lanatus</i> (Thunb.) Matsum. & Nakai    | Melancia                  | Mellitophily    |
| Rutaceae        | 53. <i>Citrus</i> spp.                                   | Citrus                    | Mellitophily    |
| Crisobalanaceae | 54. <i>Couepia bracteosa</i> Benth.                      | Pajurá                    | Mellitophily    |
| Crisobalanaceae | 55. <i>Couepia edulis</i> (Prance) Prance                | Castanha-de-Cutia         | Mellitophily    |
| Crisobalanaceae | 56. <i>Couepia longipendula</i> Pilger                   | Castanha-de-Galinha       | Mellitophily    |
| Crisobalanaceae | 57. <i>Couepia paraensis</i> (Mart. & Zucc.) Benth.      | Piraxui                   | Mellitophily    |
| Crisobalanaceae | 58. <i>Couepia subcordata</i> Benth. Ex Hook.f.          | Umarirana                 | Mellitophily    |
| Apocynaceae     | 59. <i>Couma guianensis</i> Aubl.                        | Sorva                     | Mellitophily    |
| Apocynaceae     | 60. <i>Couma macrocarpa</i> Barb. Rodr.                  | Sorva-Grande              | Mellitophily    |
| Apocynaceae     | 61. <i>Couma utilis</i> (Mart.) Muell. Arg.              | Sorvinha                  | Phalenophily    |
| Curcubitaceae   | 62. <i>Cucumis melo</i> L.                               | Melão                     | Mellitophily    |
| Fabaceae        | 63. <i>Dipteryx alata</i> Vogel                          | Baru                      | Mellitophily    |
| Humiriaceae     | 64. <i>Duckesia verrucosa</i> (Ducke) Cuatr.             | Uxicuruá                  | Undefined       |
| Annonaceae      | 65. <i>Duguetia marcgraviana</i> Mart.                   | Pindaeva                  | Cantharophily   |
| Annonaceae      | 66. <i>Duguetia stenantha</i> R. E. Fries                | Jaboti                    | Cantharophily   |
| Rubiaceae       | 67. <i>Duroia macrophylla</i> Huber                      | Cabeça-de-Urubu           | Phalenophily    |
| Rubiaceae       | 68. <i>Duroia saccifera</i> Hook. F. ex Schum.           | Puruí-do-Mata             | Phalenophily    |
| Sapotaceae      | 69. <i>Ecclinusa guianensis</i> Eyma                     | Guajaraí                  | Undefined       |
| Arecaceae       | 70. <i>Elaeis oleifera</i> (Kunth) Cortés                | Caiaué                    | Undefined       |
| Humiriaceae     | 71. <i>Endopleura uchi</i> (Huber) Cuatrecasas           | Uxi                       | Undefined       |
| Vochysiaceae    | 72. <i>Erismia japura</i> Spruce ex. Warm.               | Japurá                    | Mellitophily    |
| Myrtaceae       | 73. <i>Eugenia brasiliensis</i> Lam.                     | Grumixama                 | Mellitophily    |
| Myrtaceae       | 74. <i>Eugenia patrisii</i> Vahl                         | Ubaia                     | Mellitophily    |
| Myrtaceae       | 75. <i>Eugenia stipitata</i> McVaugh                     | Araçá-Boi                 | Mellitophily    |
| Myrtaceae       | 76. <i>Eugenia uniflora</i> L.                           | Guinjá                    | Mellitophily    |
| Arecaceae       | 77. <i>Euterpe oleracea</i> Mart.                        | Açai                      | Cantharophily   |
| Arecaceae       | 78. <i>Euterpe precatoria</i> Mart.                      | Açai-do-Amazonas          | Cantharophily   |
| Crisobalanaceae | 79. <i>Exellodendron coriaceum</i> (Berth.) Prance       | Catanharana               | Undefined       |
| Salicaceae      | 80. <i>Flacourtia jangomas</i> (Lour.) Raeusch.          | Ameixa-de-Madagascar      | Mellitophily    |
| Annonaceae      | 81. <i>Fusaea longifolia</i> (Aubl.) Safford             | Fusaia                    | Cantharophily   |
| Rubiaceae       | 82. <i>Genipa americana</i> L.                           | Jenipapo                  | Mellitophily    |
| Gnetaceae       | 83. <i>Gnetum</i> spp.                                   | Ituaí                     | Undefined       |
| Malvaceae       | 84. <i>Guazuma ulmifolia</i> Lam.                        | Mutamba                   | Mellitophily    |
| Apocynaceae     | 85. <i>Hancornia speciosa</i> Gomes                      | Mangaba                   | Phalenophily    |
| Moraceae        | 86. <i>Helicostylis tomentosa</i> (Poepp. & Endl.) Rusby | Inharé                    | Undefined       |
| Humiriaceae     | 87. <i>Humiria balsamifera</i> Aubl.                     | Umiri                     | Mellitophily    |
| Fabaceae        | 88. <i>Hymenaea stigonocarpa</i> Mart. Ex Haine          | Jatobá-do-cerrado         | Chiropterophily |
| Leguminosae     | 89. <i>Hymenaea courbaril</i> L.                         | Jutaí                     | Chiropterophily |
| Leguminosae     | 90. <i>Inga alba</i> (Sw.) Willd.                        | Inga-Turi                 | Chiropterophily |
| Leguminosae     | 91. <i>Inga capitata</i> Desv.                           | Ingá-Costela              | Chiropterophily |
| Leguminosae     | 92. <i>Inga cinnamomea</i> Spruce ex Benth.              | Ingá-Açu                  | Chiropterophily |
| Leguminosae     | 93. <i>Inga edulis</i> Mart.                             | Ingá-Cipó                 | Chiropterophily |
| Leguminosae     | 94. <i>Inga fagifolia</i> (L.) Willd. Ex Benth.          | Ingá-Cururu               | Chiropterophily |
| Leguminosae     | 95. <i>Inga heterophylla</i> Willd.                      | Ingá-Xixica               | Chiropterophily |
| Leguminosae     | 96. <i>Inga macrophylla</i> Humb. & Bonpl. Ex Willd.     | Ingapéua                  | Chiropterophily |
| Leguminosae     | 97. <i>Inga velutina</i> Willd.                          | Ingá-de-Fogo              | Chiropterophily |
| Caryocaceae     | 98. <i>Jacaratia spinosa</i> (Aubl.) A. DC.              | Jaracatiá                 | Phalenophily    |
| Sapotaceae      | 99. <i>Labatia macrocarpa</i> Mart.                      | Cabeça-de-Macaco          | Undefined       |
| Apocynaceae     | 100. <i>Lacmellea arborescens</i> (Muell. Arg.) Monach.  | Tucujá                    | Phalenophily    |
| Quiinaceae      | 101. <i>Lacunaria jenmani</i> (Oliv.) Ducke.             | Moela-de-Mutum            | Mellitophily    |

Table 2. Continued

| Family          | Scientific name                                                                  | Brazilian vernacular name | Syndrome        |
|-----------------|----------------------------------------------------------------------------------|---------------------------|-----------------|
| Lecitidaceae    | 102. <i>Lecythis pisonis</i> Cambess.subesp <i>usitata</i> (Miers) Mori & Prance | Sapucaia                  | Mellitophily    |
| Arecaceae       | 103. <i>Leopoldina major</i> Wallace                                             | Jará-Açu                  | Undefined       |
| Crisobalanaceae | 104. <i>Licania tomentosa</i> (Benth.) Frit.                                     | Oiti                      | Mellitophily    |
| Moraceae        | 105. <i>Maclura tinctoria</i> (L.) D.Don ex Steud                                | Taiuva                    | Undefined       |
| Malpigiaceae    | 106. <i>Malpighia puniceifolia</i> L., <i>M. retusa</i> Benth.                   | Acerola                   | Mellitophily    |
| Clusiaceae      | 107. <i>Mammea americana</i> L.                                                  | Abriçó                    | Mellitophily    |
| Anacardiaceae   | 108. <i>Mangifera indica</i> L.                                                  | Manga                     | Myophily        |
| Sapotaceae      | 109. <i>Manilkara huberi</i> (Ducke) Chevalier                                   | Maçaranduba               | Myophily        |
| Sapotaceae      | 110. <i>Manilkara zapota</i> (L.) P. Royen                                       | Sapotilha                 | Mellitophily    |
| Arecaceae       | 111. <i>Mauritia flexuosa</i> L.f.                                               | Miriti                    | Cantharophily   |
| Arecaceae       | 112. <i>Mauritiella armata</i> (Mart.) Burr.                                     | Caraná (buriti)           | Cantharophily   |
| Arecaceae       | 113. <i>Maximiliana maripa</i> (Aubl.) Drude                                     | Inajá                     | Cantharophily   |
| Sapindaceae     | 114. <i>Melicoccus bijugatus</i> Jacq.                                           | Pitomba-das-Guianas       | Mellitophily    |
| Sapotaceae      | 115. <i>Micropholis acutangula</i> (Ducke) Eyma                                  | Abiu-carambola            | Mellitophily    |
| Melastomataceae | 116. <i>Mouriri apiranga</i> Spruce ex Triana                                    | Apiranga                  | Mellitophily    |
| Melastomataceae | 117. <i>Mouriri eugeniifolia</i> Spruce ex Triana                                | Dauicu                    | Mellitophily    |
| Malastomataceae | 118. <i>Mouriri ficoides</i> Morley                                              | Muriri                    | Mellitophily    |
| Melastomataceae | 119. <i>Mouriri grandiflora</i> DC.                                              | Camutim                   | Mellitophily    |
| Melastomataceae | 120. <i>Mouriri guianensis</i> Aubl.                                             | Gurguri                   | Phalenophily    |
| Melastomataceae | 121. <i>Mouriri pusa</i> Gardner                                                 | Puçá                      | Mellitophily    |
| Melastomataceae | 122. <i>Mouriri trunciflora</i> Ducke                                            | Miraua                    | Mellitophily    |
| Polygalaceae    | 123. <i>Moutabea chodatiana</i> Huber                                            | Gogó-de-Guariba           | Undefined       |
| Musaceae        | 124. <i>Musa X paradisiaca</i> L.                                                | Banana                    | Chiropterophily |
| Myrtaceae       | 125. <i>Myrcia fallax</i> (Rich.) DC.                                            | Frutinha                  | Mellitophily    |
| Myrtaceae       | 126. <i>Myrciaria dubia</i> (KUNTH) McVaugh                                      | Çaçari, camu-camuzeiro    | Mellitophily    |
| Sapotaceae      | 127. <i>Neoxythece elegans</i> (A. DC) Aubr                                      | Caramuri                  | Undefined       |
| Arecaceae       | 128. <i>Oenocarpus bacaba</i> Mart.                                              | Bacaba                    | Cantharophily   |
| Arecaceae       | 129. <i>Oenocarpus bataua</i> Mart.                                              | Patauá                    | Cantharophily   |
| Arecaceae       | 130. <i>Oenocarpus mapora</i> Karsten                                            | Bacabinha                 | Cantharophily   |
| Arecaceae       | 131. <i>Oenocarpus minor</i> Mart.                                               | Bacabi                    | Cantharophily   |
| Arecaceae       | 132. <i>Oenocarpus distichus</i> Mart.                                           | Bacaba-de-Leque           | Cantharophily   |
| Arecaceae       | 133. <i>Orbignya phalerata</i> Mart.                                             | Babaçor                   | Undefined       |
| Bombacaceae     | 134. <i>Pachira aquatica</i> Aubl.                                               | Maporana                  | Chiropterophily |
| Apocynaceae     | 135. <i>Parahancornia amapa</i> (Hub.) Ducke                                     | Amapá                     | Phalenophily    |
| Crisobalanaceae | 136. <i>Parinari montana</i> Aubl.                                               | Pajurá-da-Mata            | Mellitophily    |
| Crisobalanaceae | 137. <i>Parinari sprucei</i> Hook.f.                                             | Uará                      | Mellitophily    |
| Passifloraceae  | 138. <i>Passiflora edulis</i> Sims f. <i>flavicarpas</i> Deg.                    | Maracujá                  | Mellitophily    |
| Passifloraceae  | 139. <i>Passiflora nitida</i> Kunth                                              | Maracujá-Suspiro          | Mellitophily    |
| Passifloraceae  | 140. <i>Passiflora quadrangularis</i> L.                                         | Maracujá-Açu              | Mellitophily    |
| Sapindaceae     | 141. <i>Paullinia cupana</i> H.B.K. var. <i>sorbilis</i> (Mart.) Ducke           | Guaraná                   | Mellitophily    |
| Hippocrateaceae | 142. <i>Peritassa laevigata</i> (Hoffm. Ex Link.) A. C. Smith                    | Gulosa                    | Mellitophily    |
| Lauraceae       | 143. <i>Persea americana</i> Mill. Var. <i>americana</i> Mill                    | Abacate                   | Mellitophily    |
| Solanaceae      | 144. <i>Physalis angulata</i> L.                                                 | Camapu                    | Myophily        |
| Clusiaceae      | 145. <i>Platonia insignis</i> Mart.                                              | Bacuri                    | Ornithophily    |
| Acacinaceae     | 146. <i>Poraqueiba paraensis</i> Ducke                                           | Umari ou Mari             | Mellitophily    |
| Anacardiaceae   | 147. <i>Poupartia amazonica</i> Ducke                                            | Jacaiacá                  | Undefined       |
| Moraceae        | 148. <i>Pourouma cecropiifolia</i> Mart.                                         | Mapati                    | Mellitophily    |
| Sapotaceae      | 149. <i>Pouteria caimito</i> (Ruiz & Pavon) Radlk.                               | Abiu                      | Mellitophily    |
| Sapotaceae      | 150. <i>Pouteria macrocarpa</i> (Huber) Baehni                                   | Cutite-Grande             | Mellitophily    |
| Sapotaceae      | 151. <i>Pouteria macrophylla</i> (Lam.) Eyma                                     | Cutite                    | Mellitophily    |
| Sapotaceae      | 152. <i>Pouteria pariry</i> (Ducke) Baehni                                       | Pariri                    | Undefined       |
| Sapotaceae      | 153. <i>Pouteria ramiflora</i> (Mart.) Radlk                                     | Abiu-do-cerrado           | Undefined       |
| Sapotaceae      | 154. <i>Pouteria speciosa</i> (Ducke) Baehni                                     | Pajurá-de-Óbidos          | Undefined       |
| Sapotaceae      | 155. <i>Pouteria</i> spp.                                                        | Abiurana                  | Mellitophily    |
| Sapotaceae      | 156. <i>Pouteria torta</i> (Mart.) Ralk                                          | Abiu-Piloso               | Mellitophily    |
| Sapotaceae      | 157. <i>Pouteria ucuqui</i> Pires & Schultes                                     | Ucuqui                    | Mellitophily    |
| Myrtaceae       | 158. <i>Psidium acutangulum</i> DC.                                              | Araçá-Pera                | Mellitophily    |
| Myrtaceae       | 159. <i>Psidium guajava</i> L.                                                   | Goíaba                    | Mellitophily    |
| Myrtaceae       | 160. <i>Psidium guineense</i> Swartz                                             | Araçá                     | Mellitophily    |
| Bombacaceae     | 161. <i>Quararibea cordata</i> (Bonpl.) Visch.                                   | Sapota-do-Solimões        | Mellitophily    |
| Quiinaceae      | 162. <i>Quiina florida</i> Tul.                                                  | Pama                      | Undefined       |
| Clusiaceae      | 163. <i>Rheedia acuminata</i> (Rui & Pav.) Planch. & Triana                      | Bacurizinho               | Mellitophily    |
| Clusiaceae      | 164. <i>Rheedia brasiliensis</i> (Mart. Planch. & Triana                         | Bacuripari-Liso           | Mellitophily    |
| Clusiaceae      | 165. <i>Rheedia gardneriana</i> Miers ex. Planch. & Triana                       | Bacuri mirim              | Mellitophily    |

Table 2. Continued

| Family          | Scientific name                                               | Brazilian vernacular name | Syndrome      |
|-----------------|---------------------------------------------------------------|---------------------------|---------------|
| Clusiaceae      | 166. <i>Rbeedia macrophylla</i> (Mart.) Planch. & Triana      | Bacuripari                | Mellitophily  |
| Annonaceae      | 167. <i>Rollinia mucosa</i> (Jacq.) Baill.                    | Biribá                    | Cantharophily |
| Humiriaceae     | 168. <i>Sacoglottis guianensis</i> Benth.                     | Achuá                     | Mellitophily  |
| Hippocrateaceae | 169. <i>Salacia impressifolia</i> (Miers) A.C. Smith          | Uaimiratipi               | Undefined     |
| Arecaceae       | 170. <i>Scheelea phalerata</i> (Mart.) Burret                 | Acuri                     | Undefined     |
| Solanaceae      | 171. <i>Solanum sessiliflorum</i> Dunal.                      | Cubiu                     | Undefined     |
| Anacardiaceae   | 172. <i>Spondias dulcis</i> Park.                             | Cajarana                  | Mellitophily  |
| Anacardiaceae   | 173. <i>Spondias mombin</i> L.                                | Taperebá                  | Mellitophily  |
| Myrtaceae       | 174. <i>Syzygium cumini</i> (L.) Skeels                       | Ameixa                    | Mellitophily  |
| Myrtaceae       | 175. <i>Syzygium malaccense</i> (L.) Merr. & L. M. Perry      | Jambo                     | Mellitophily  |
| Myrtaceae       | 176. <i>Syzygium samarangense</i> (Blume) Merr. & L.M. Perry  | Jambo-Rosa                | Mellitophily  |
| Sapindaceae     | 177. <i>Talisia esculenta</i> (A. St. Hil.) Radlk             | Pitomba                   | Mellitophily  |
| Leguminosae     | 178. <i>Tamarindus indica</i> L.                              | Tamarindo                 | Mellitophily  |
| Malvaceae       | 179. <i>Theobroma bicolor</i> Humb. & Bonpl.                  | Cacacu-do-Peru            | Mellitophily  |
| Malvaceae       | 180. <i>Theobroma cacao</i> L.                                | Cacau                     | Mellitophily  |
| Malvaceae       | 181. <i>Theobroma canumanense</i> Pires &Fróes ex Cuatrecasas | Cupuaçu-do-Mato           | Mellitophily  |
| Sterculiaceae   | 182. <i>Theobroma grandiflorum</i> (Willd. Ex Spreng.) Schum  | Cupuaçu                   | Cantharophily |
| Malvaceae       | 183. <i>Theobroma mariae</i> (Mart.) Schum.                   | Cacau-Jacaré              | Mellitophily  |
| Malvaceae       | 184. <i>Theobroma obovatum</i> Klotsch ex Bernoulli           | Cabeça-de-Urubu           | Mellitophily  |
| Malvaceae       | 185. <i>Theobroma speciosum</i> Willd.                        | Cacauí                    | Myophily      |
| Malvaceae       | 186. <i>Theobroma subincanum</i> Mart.                        | Cupuí                     | Mellitophily  |
| Annonaceae      | 187. <i>Xylopia romatica</i> (Lam.) Mart.                     | Pimenta-de-Macaco         | Cantharophily |
| Rhamnaceae      | 188. <i>Zizyphus mauritiana</i> Lam.                          | Dão                       | Mellitophily  |

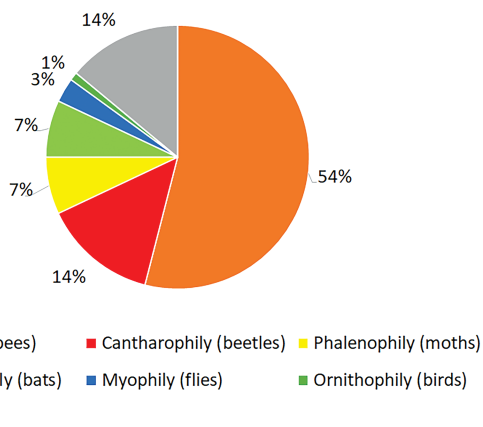

Fig. 1. Percentage of pollination syndromes of 188 edible fruit plant species in the Amazon Tropical Forest.

four Chiroptera (Fig. 2; Supp Information 1 [online only]). Honey bee (*Apis mellifera* Linnaeus, 1758) was highlighted as being associated to the largest number of plant species. Stingless bees belonging to the genera *Trigona* Jurine 1807 (Hymenoptera: Apidae), *Partamona* Schwarz 1939 (Hymenoptera: Apidae), *Melipona* Illiger 1806 (Hymenoptera: Apidae), and *Trigonisca* Moure 1950 (Hymenoptera: Apidae) were also emphasized as exhibiting the highest number of species quoted as pollinators. *Trigona pallens* (Fabricius, 1798) (Hymenoptera: Apidae) and *T. fulviventris* Guérin, 1844 (Hymenoptera: Apidae) are also noteworthy, exhibiting the highest number of interacting plant species (Fig. 3).

## Discussion

Results obtained through pollination syndrome showed that half of all edible fruit plant species analyzed exhibit mellitophily syndrome, indicating the importance of bees. Our data also showed that all

the different insect groups determined by pollination syndrome are responsible for pollinating more than two-third of all plant species analyzed. Through the literature review, bee and beetle species were also particularly emphasized.

As already stated, bees are widely considered as important crop pollinators, especially highly social bees (Slaa et al. 2006, Giannini et al. 2020a). Traditional communities and indigenous people also acknowledge the importance of bees (Potts et al. 2016). In the Amazon, the importance of bees for indigenous people was documented among Kayapó tribe (Posey 1985, Posey and Camargo 1985), and other indigenous people (Athayde et al. 2016), mainly for honey and wax hunting and beekeeping practices. Bee diversity is also recognized by them as representing a key aspect (Athayde et al. 2016).

Native bees are especially important to pollination and they are considered as being more efficient for crop pollination than exotic species, such as the honey bee (Garibaldi et al. 2013). Competition between native bees and honey bees was demonstrated in forests of Mexico (Roubik and Villanueva-Gutierrez 2009). However, there is no study about competition conducted within Amazon forests, and we still have scarce data about the role of honey bees in this biome. Previous studies showed that honey bees are more prevalent on deforested areas than inside the closed forests of south-western Amazon (Brown et al. 2016). Nevertheless, they were reported as an important alternative pollinator on deforested lands (Dick et al. 2003, Ricketts 2004). The Amazon harbor a rich diversity of native stingless bees (ca. 190 species, Pedro 2014). These bees present a wide diet breadth (Ramalho 2004, Lichtenberg et al. 2017) and are considered as key pollinators of forests (Bawa 1990). For Brazil, other bee species are also recognized as important effective pollinators, as the solitary bee species *Centris* Fabricius, 1804 (Hymenoptera: Apidae) and *Xylocopa* Latreille, 1802 (Hymenoptera: Apidae) and the primitively eusocial *Bombus* Latreille, 1802 (Hymenoptera: Apidae) (Giannini et al. 2020a). Important non-bee insects reported as crop pollinators in Brazil were beetles (Curculionidae and

**Table 3.** Bee species previously quoted in the literature as pollinator/visitor of analyzed edible plant species in the Brazilian Amazon Forest (classification according to Moure et al. 2007) (complete information can be found in the [Supp Information 1 \[online only\]](#))

| Family | Tribe           | Bee species                                                           | Brazilian vernacular name of plant species                                                                 |
|--------|-----------------|-----------------------------------------------------------------------|------------------------------------------------------------------------------------------------------------|
| Apidae | Meliponini      | 1. <i>Aparatrigona impunctata</i> (Ducke, 1916)                       | cupuaçu; açaí                                                                                              |
| Apidae | Apini           | 2. <i>Apis mellifera</i> Linnaeus, 1758                               | cauí; tucumã-do-pará; melão; araçá-boi; manga; caçari; abacate; araçá-pera; goiaba; taperebá; muruci; açaí |
| Apidae | Augochlorini    | 3. <i>Augochlora</i> Smith, 1853                                      | açaí                                                                                                       |
| Apidae | Augochlorini    | 4. <i>Augochlorodes</i> Moure, 1958                                   | açaí                                                                                                       |
| Apidae | Augochlorini    | 5. <i>Augochloropsis crassigena</i> Moure, 1943                       | muruci                                                                                                     |
| Apidae | Augochlorini    | 6. <i>Augochloropsis</i> Cockerell, 1897                              | açaí                                                                                                       |
| Apidae | Bombini         | 7. <i>Bombus brevivulus</i> Franklin 1913                             | castanha-do-pará                                                                                           |
| Apidae | Bombini         | 8. <i>Bombus transversalis</i> (Olivier, 1789)                        | castanha-do-pará; urucum                                                                                   |
| Apidae | Meliponini      | 9. <i>Celetrigona longicornis</i> (Friese, 1903)                      | açaí                                                                                                       |
| Apidae | Centridini      | 10. <i>Centris</i> sp Fabricius, 1804                                 | caju                                                                                                       |
| Apidae | Centridini      | 11. <i>Centris aenea</i> Lepeletier, 1841                             | goiaba                                                                                                     |
| Apidae | Centridini      | 12. <i>Centris americana</i> Klug, 1810                               | castanha-do-pará; acerola                                                                                  |
| Apidae | Centridini      | 13. <i>Centris bicolor</i> Lepeletier, 1841                           | muruci                                                                                                     |
| Apidae | Centridini      | 14. <i>Centris byrsonimae</i> Muhlmann & Oliveira sp. n               | muruci                                                                                                     |
| Apidae | Centridini      | 15. <i>Centris carikeri</i> Cockerell, 1919                           | castanha-do-pará                                                                                           |
| Apidae | Centridini      | 16. <i>Centris caxienses</i> (Ducke 1907)                             | muruci                                                                                                     |
| Apidae | Centridini      | 17. <i>Centris decolorata</i> Lepeletier, 1841                        | muruci                                                                                                     |
| Apidae | Centridini      | 18. <i>Centris denudans</i> Lepeletier, 1841                          | castanha-do-pará                                                                                           |
| Apidae | Centridini      | 19. <i>Centris ferruginea</i> Lepeletier, 1841                        | castanha-do-pará                                                                                           |
| Apidae | Centridini      | 20. <i>Centris flavifrons</i> Fabricius, 1775                         | acerola; muruci                                                                                            |
| Apidae | Centridini      | 21. <i>Centris fuscata</i> Lepeletier, 1841                           | muruci                                                                                                     |
| Apidae | Centridini      | 22. <i>Centris longimana</i> Fabricius, 1804                          | acerola; muruci                                                                                            |
| Apidae | Centridini      | 23. <i>Centris rhodoprocta</i> Moure & Seabra, 1960                   | acerola; muruci                                                                                            |
| Apidae | Centridini      | 24. <i>Centris similis</i> Fabricius, 1804                            | castanha-do-pará                                                                                           |
| Apidae | Centridini      | 25. <i>Centris spilopoda</i> Moure, 1969                              | muruci                                                                                                     |
| Apidae | Centridini      | 26. <i>Centris sponsa</i> Smith, 1854                                 | muruci                                                                                                     |
| Apidae | Centridini      | 27. <i>Centris tarsata</i> Smith, 1874                                | muruci                                                                                                     |
| Apidae | Centridini      | 28. <i>Centris terminata</i> Smith, 1874                              | acerola                                                                                                    |
| Apidae | Centridini      | 29. <i>Centris trigonoides</i> Lepeletier, 1841                       | muruci                                                                                                     |
| Apidae | Meliponini      | 30. <i>Cephalotrigona capitata</i> (Smith, 1854)                      | açaí                                                                                                       |
| Apidae | Xylocopini      | 31. <i>Ceratina</i> Latreille, 1802                                   | açaí                                                                                                       |
| Apidae | Halictini       | 32. <i>Dialictus</i> Robertson, 1902                                  | açaí                                                                                                       |
| Apidae | Anthidiini      | 33. <i>Dicranthidium arenarium</i> (Ducke, 1907)                      | muruci                                                                                                     |
| Apidae | Meliponini      | 34. <i>Dolichotrigona longitarsis</i> (Ducke, 1916)                   | açaí                                                                                                       |
| Apidae | Centridini      | 35. <i>Epicharis affinis</i> Smith, 1874                              | castanha-do-pará; urucum                                                                                   |
| Apidae | Centridini      | 36. <i>Epicharis analis</i> Lepeletier, 1841                          | muruci                                                                                                     |
| Apidae | Centridini      | 37. <i>Epicharis bicolor</i> Smith, 1854                              | muruci                                                                                                     |
| Apidae | Centridini      | 38. <i>Epicharis conica</i> Smith, 1874                               | castanha-do-pará                                                                                           |
| Apidae | Centridini      | 39. <i>Epicharis flava</i> Friese, 1900                               | castanha-do-pará; urucum; muruci                                                                           |
| Apidae | Centridini      | 40. <i>Epicharis rustica</i> Friese, 1900                             | castanha-do-pará; urucum                                                                                   |
| Apidae | Centridini      | 41. <i>Epicharis umbraculata</i> Friese, 1900                         | castanha-do-pará; muruci                                                                                   |
| Apidae | Centridini      | 42. <i>Epicharis zonata</i> Smith 1854                                | castanha-do-pará                                                                                           |
| Apidae | Euglossini      | 43. <i>Euglossini</i> Latreille, 1802                                 | mangaba                                                                                                    |
| Apidae | Euglossini      | 44. <i>Eulaema bombiformis</i> (Packard, 1869)                        | araçá-pera                                                                                                 |
| Apidae | Euglossini      | 45. <i>Eufriesea flaviventris</i> (Friese, 1899)                      | castanha-do-pará                                                                                           |
| Apidae | Euglossini      | 46. <i>Eufriesea purpurata</i> (Mocsáry, 1896)                        | castanha-do-pará                                                                                           |
| Apidae | Euglossini      | 47. <i>Eulaema cingulata</i> Moure, 1950                              | castanha-do-pará; urucum                                                                                   |
| Apidae | Euglossini      | 48. <i>Eulaema meriana</i> (Olivier, 1789)                            | castanha-do-pará; urucum                                                                                   |
| Apidae | Euglossini      | 49. <i>Eulaema mocsaryi</i> (Friese, 1899)                            | castanha-do-pará; araçá-boi                                                                                |
| Apidae | Euglossini      | 50. <i>Eulaema nigrata</i> Lepeletier, 1841                           | castanha-do-pará; cubiu                                                                                    |
| Apidae | Exomalopsini    | 51. <i>Exomalopsis</i> Spinola, 1853                                  | açaí                                                                                                       |
| Apidae | Exomalopsini    | 52. <i>Exomalopsis auropilosa</i> Spinola, 1853                       | caçari                                                                                                     |
| Apidae | Meliponini      | 53. <i>Frieseomelitta longipes</i> (Smith, 1854)                      | açaí                                                                                                       |
| Apidae | Meliponini      | 54. <i>Frieseomelitta portoi</i> (Friese, 1900)                       | açaí                                                                                                       |
| Apidae | Meliponini      | 55. <i>Geotrigona aequinoctialis</i> (Ducke, 1925)                    | açaí                                                                                                       |
| Apidae | Halictini       | 56. <i>Habralictus</i> Moure, 1941                                    | açaí                                                                                                       |
| Apidae | Hylaeini        | 57. <i>Hylaeus</i> Fabricius, 1793                                    | açaí                                                                                                       |
| Apidae | Meliponini      | 58. <i>Leurotrigona pusilla</i> Moure & Camargo, in Moure et al. 1988 | cupuaçu                                                                                                    |
| Apidae | Tapinotaspidini | 59. <i>Lophopedia pygmaea</i> (Schrottky, 1902)                       | muruci                                                                                                     |
| Apidae | Megachilini     | 60. <i>Megachile</i> Latreille, 1802                                  | caju                                                                                                       |



Table 3. Continued

| Family | Tribe           | Bee species                                                    | Brazilian vernacular name of plant species |
|--------|-----------------|----------------------------------------------------------------|--------------------------------------------|
| Apidae | Augochlorini    | 61. <i>Megalopta aeneicollis</i> Friese, 1926                  | guaraná                                    |
| Apidae | Augochlorini    | 62. <i>Megalopta amoena</i> (Spinola, 1853)                    | guaraná                                    |
| Apidae | Augochlorini    | 63. <i>Megalopta sodalis</i> (Vachal, 1904)                    | guaraná                                    |
| Apidae | Meliponini      | 64. <i>Melipona brachychaeta</i> Moure, 1950                   | jambo                                      |
| Apidae | Meliponini      | 65. <i>Melipona compressipes</i> Smith, 1854                   | çaçari                                     |
| Apidae | Meliponini      | 66. <i>Melipona fasciculata</i> Smith, 1854                    | urucum; çaçari; taperebá                   |
| Apidae | Meliponini      | 67. <i>Melipona flavolineata</i> Friese, 1900                  | çaçari; taperebá; açai                     |
| Apidae | Meliponini      | 68. <i>Melipona melanoventer</i> Schwarz, 1932                 | urucum                                     |
| Apidae | Meliponini      | 69. <i>Melipona paraenses</i> Ducke, 1916                      | acerola                                    |
| Apidae | Meliponini      | 70. <i>Melipona seminigra</i> Friese, 1903                     | çaçari; taperebá; jambo                    |
| Apidae | Meliponini      | 71. <i>Nannotrigona dutrae</i> (Friese, 1901)                  | açai                                       |
| Apidae | Meliponini      | 72. <i>Nannotrigona punctata</i> (Smith, 1854)                 | çaçari; muruci; açai                       |
| Apidae | Meliponini      | 73. <i>Nannotrigona schultzei</i> (Friese, 1901)               | açai                                       |
| Apidae | Augochlorini    | 74. <i>Neocorynura Schrottky</i> , 1910                        | açai                                       |
| Apidae | Meliponini      | 75. <i>Oxytrigona ignis</i> Camargo, 1984                      | açai                                       |
| Apidae | Meliponini      | 76. <i>Oxytrigona</i> Cockerell, 1917                          | açai                                       |
| Apidae | Tapinotaspidini | 77. <i>Paratetrapedia</i> Moure, 1941                          | açai                                       |
| Apidae | Tapinotaspidini | 78. <i>Paratetrapedia leucostoma</i> (Cockerell, 1923)         | muruci                                     |
| Apidae | Tapinotaspidini | 79. <i>Paratetrapedia testacea</i> (Smith, 1854)               | muruci                                     |
| Apidae | Meliponini      | 80. <i>Paratrigona peltata</i> (Spinola, 1853)                 | açai                                       |
| Apidae | Meliponini      | 81. <i>Partamona ailyae</i> Camargo, 1980                      | açai                                       |
| Apidae | Meliponini      | 82. <i>Partamona cupira</i> (Smith, 1863)                      | çaçari                                     |
| Apidae | Meliponini      | 83. <i>Partamona mourei</i> Camargo, 1980                      | jambo                                      |
| Apidae | Meliponini      | 84. <i>Partamona pearsoni</i> (Schwarz, 1938)                  | jambo; açai                                |
| Apidae | Meliponini      | 85. <i>Partamona</i> Schwarz, 1939                             | çaçari                                     |
| Apidae | Meliponini      | 86. <i>Partamona testacea</i> (Klug, 1807)                     | jambo; açai                                |
| Apidae | Meliponini      | 87. <i>Partamona vicina</i> Camargo, 1980                      | açai                                       |
| Apidae | Meliponini      | 88. <i>Pereirapis</i> Moure 1943                               | açai                                       |
| Apidae | Meliponini      | 89. <i>Plebeia alvarengai</i> Moure 1994                       | açai                                       |
| Apidae | Meliponini      | 90. <i>Plebeia fallax</i> Hibbs                                | muruci                                     |
| Apidae | Meliponini      | 91. <i>Plebeia minima</i> (Gribodo, 1893)                      | Cupuaçu; açai                              |
| Apidae | Meliponini      | 92. <i>Plebeia</i> Schwarz, 1938                               | açai                                       |
| Apidae | Diphaglossini   | 93. <i>Ptiloglossa lucernarum</i> Cockerell, 1923              | guaraná                                    |
| Apidae | Meliponini      | 94. <i>Ptilotrigona lurida</i> (Smith, 1854)                   | araçá-boi; açai                            |
| Apidae | Meliponini      | 95. <i>Scaptotrigona postica</i> (Latreille, 1807)             | taperebá; muruci; açai                     |
| Apidae | Meliponini      | 96. <i>Scaura latitarsis</i> (Friese, 1900)                    | açai                                       |
| Apidae | Meliponini      | 97. <i>Scaura tenuis</i> (Ducke, 1916)                         | açai                                       |
| Apidae | Augochlorini    | 98. <i>Temnosoma</i> Smith 1853                                | açai                                       |
| Apidae | Meliponini      | 99. <i>Tetragona beebei</i> (Schwarz, 1938)                    | muruci                                     |
| Apidae | Meliponini      | 100. <i>Tetragona clavipes</i> (Fabricius, 1804)               | acerola                                    |
| Apidae | Meliponini      | 101. <i>Tetragonisca angustula</i> (Latreille, 1811)           | cupuaçu                                    |
| Apidae | Meliponini      | 102. <i>Tetrapedia diversipes</i> Klug, 1810                   | muruci                                     |
| Apidae | Meliponini      | 103. <i>Trigona amazonenses</i> (Ducke, 1916)                  | jambo                                      |
| Apidae | Meliponini      | 104. <i>Trigona branneri</i> Cockerell, 1912                   | çaçari; jambo; açai                        |
| Apidae | Meliponini      | 105. <i>Trigona dallatorreana</i> Friese, 1900                 | jambo                                      |
| Apidae | Meliponini      | 106. <i>Trigona fulviventris</i> Guérin, 1844                  | cubiu; taperebá; cupuaçu; muruci           |
| Apidae | Meliponini      | 107. <i>Trigona fuscipennis</i> Friese, 1900                   | taperebá; muruci; açai                     |
| Apidae | Meliponini      | 108. <i>Trigona guianae</i> Cockerell, 1910                    | açai                                       |
| Apidae | Meliponini      | 109. <i>Trigona pallens</i> (Fabricius, 1798)                  | cupuaçu; çaçari; taperebá; muruci; açai    |
| Apidae | Meliponini      | 110. <i>Trigona recursa</i> Smith, 1863                        | çaçari; açai                               |
| Apidae | Meliponini      | 111. <i>Trigona</i> Jurine, 1807                               | carambola                                  |
| Apidae | Meliponini      | 112. <i>Trigona williana</i> Friese, 1900                      | jambo                                      |
| Apidae | Meliponini      | 113. <i>Trigonisca dozbhanskyi</i> (Moure, 1950)               | açai                                       |
| Apidae | Meliponini      | 114. <i>Trigonisca extrema</i> Albuquerque & Camargo, 2007     | muruci                                     |
| Apidae | Meliponini      | 115. <i>Trigonisca hirticornis</i> Albuquerque & Camargo, 2007 | açai                                       |
| Apidae | Meliponini      | 116. <i>Trigonisca nataliae</i> (Moure, 1950)                  | açai                                       |
| Apidae | Meliponini      | 117. <i>Trigonisca pediculana</i> (Fabricius, 1804)            | muruci                                     |
| Apidae | Meliponini      | 118. <i>Trigonisca unidentata</i> Albuquerque & Camargo, 2007  | açai                                       |
| Apidae | Meliponini      | 119. <i>Trigonisca vitrifrons</i> Albuquerque & Camargo, 2007  | açai                                       |
| Apidae | Tapinotaspidini | 120. <i>Tropidopedia punctifrons</i> (Smith, 1879)             | muruci                                     |
| Apidae | Tapinotaspidini | 121. <i>Xanthopedia globulosa</i> (Friese, 1899)               | muruci                                     |
| Apidae | Xylocopini      | 122. <i>Xylocopa aurulenta</i> (Fabricius, 1804)               | urucum                                     |
| Apidae | Xylocopini      | 123. <i>Xylocopa frontalis</i> Olivier, 1789                   | castanha-do-pará; urucum                   |
| Apidae | Xylocopini      | 124. <i>Xylocopa</i> Latreille, 1802                           | goiaba                                     |

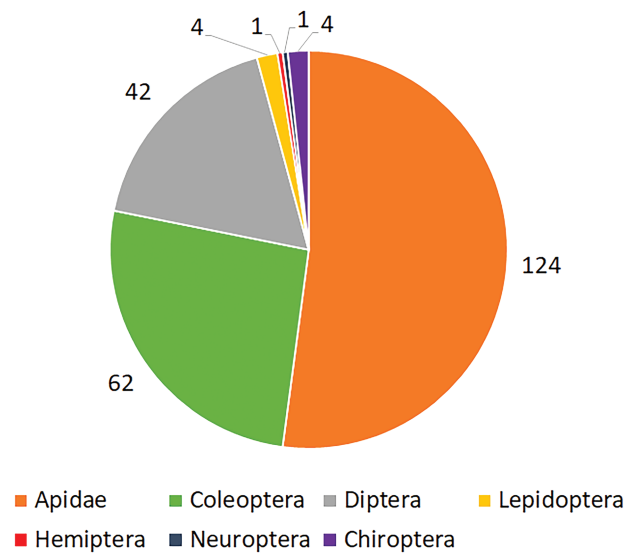

**Fig. 2.** Number of taxa cited in previous works about pollinator/visitor in 52 of the analyzed edible fruit plant species in the Amazon Tropical Forest. Taxa of Apidae family are quoted on Table 3. All taxa can be found in the [Supp Information 1 \(online only\)](#).

Chrysomelidae) and flies (Syrphidae) (Giannini et al. 2015a), playing a significant role as crop pollinators globally and providing potential insurance against bee decline (Rader et al. 2016).

Among the Amazon plant species that depend on bees, *Bertholletia excelsa* HBK (Cavalcante et al. 2018), which is popularly known as the Brazil nut tree, is noteworthy, because its nuts present high nutritional and economic value (Kainer et al. 2018). Bee pollinators include two species of primitively social *Bombus* Latreille, 1802 (Hymenoptera: Apidae) and 18 species of solitary bees. Another native species with high economic value is passion fruit (*Passiflora edulis* Sims f. *flavicarpa* Deg), mainly pollinated by larger solitary bees such as *Xylocopa* Latreille, 1802 (Hymenoptera: Apidae) (Yamamoto et al. 2012); however, no study was found about passion fruit pollination in the Amazon forest. This species is cultivated in all states of Brazil, with a total production of more than 550,000 tons (2017 data from the Brazilian Institute of Geography and Statistics - IBGE), and it is highly dependent on pollination to produce its fruits; thus, in the absence of pollinators, production does not occur (Yamamoto et al. 2012).

The second most important pollinator group were beetles, with plants displaying specific adaptations for beetle pollination classified as cantharophilous. This pollination syndrome was primarily

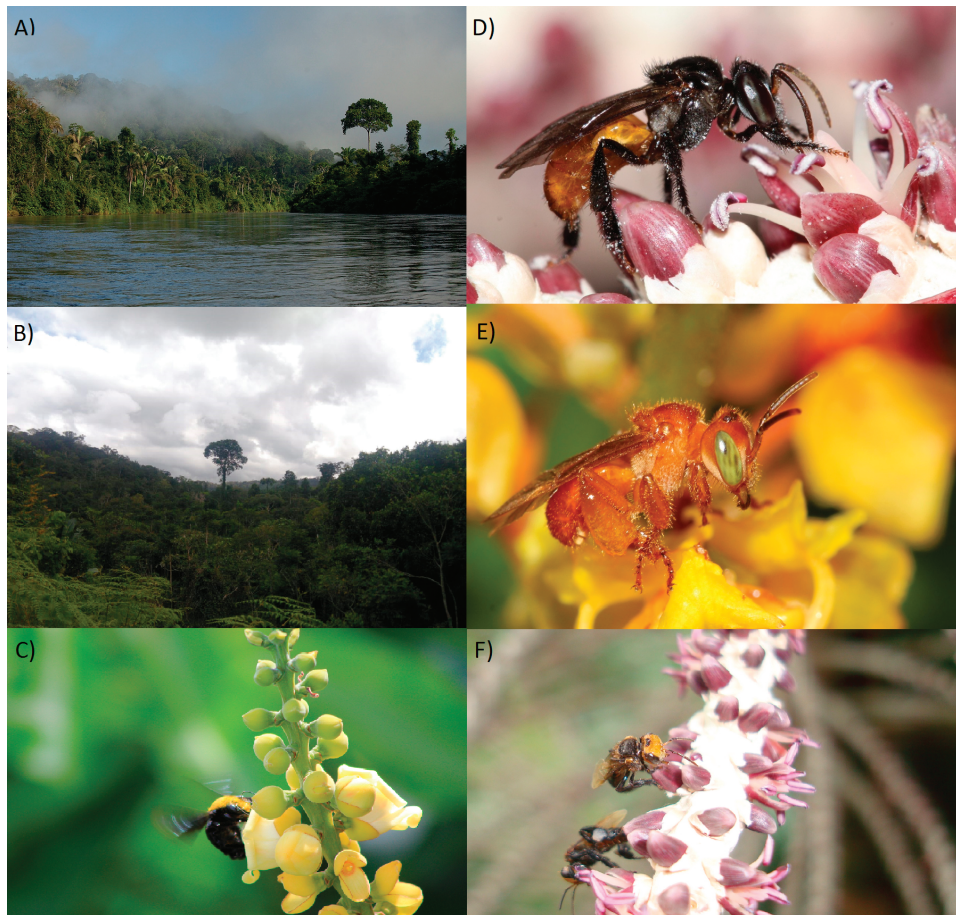

**Fig. 3.** (A and B) Aspects of the Amazon Forest with the striking view of Brazil nut tree (*Bertholletia excelsa*) with its high stature and straight trunk (Photos: João Rosa and Rafael M. Brito, respectively); (C) Carpenter bee (*Xylocopa frontalis* Olivier, 1789 (Hymenoptera: Apidae)) on Brazil nut blossom (Photo: Marcia M. Maués); (D) *Trigona fulviventris* (male) on muruci (*Byrsonima crassifolia*) flower (Photo: Cristiano Menezes); (E) *Trigona pallens* (Hymenoptera: Apidae) on açai (*Euterpe oleracea*) inflorescence (Photo: Cristiano Menezes); and (F) *Oxytrigona* sp. (Hymenoptera: Apidae) on açai (*Euterpe oleracea*) inflorescence (Photo: Alistair J. Campbell).

associated with Amazon palm species, such as the inajá (*Maximiliana maripa* (Aubl.) Drude) and bacaba (*Oenocarpus bacaba* Mart.). Beetles reported here included *Cyclocephala distincta* Burmeister, 1847 (Coleoptera: Scarabaeidae); *Belopeus carmelitus* (Germar, 1824) (Coleoptera: Curculionidae); and species of Epitragini tribe. The beetles that pollinate these species of palm trees are attracted by the floral scents produced by thermogenesis of the inflorescences (Oliveira et al. 2003), and such an interaction has been previously documented in other species, as those belonging to the Araceae family (Gottsberger 1990; Maia et al. 2010, 2013). Beetles of both sexes are attracted by the fragrance of flowers, which they use as a mating site, thus enabling pollination (Gottsberger 1986, Bernhardt 2000).

Despite providing an important indication of the main pollinators for each plant species, especially for megadiverse habitats, the pollination syndrome concept has received criticism, mainly because many plants can be pollinated by different pollinators, and it has been suggested that results should be better understood as working hypotheses (Quintero et al. 2017). Two cases here are noteworthy since the analyzed plants exhibit a complex pollination syndrome. One of them is açai palm (*Euterpe oleracea* Mart.) that was classified here as predominately pollinated by beetles. However, a recent study determined over 100 species acting as pollinators, including, besides beetles, bees, flies, wasps, and ants (Campbell et al. 2018). Another example is cocoa (*Theobroma cacao* L.) that was considered here as being mainly pollinated by bees, but also presents a complex pollination system recently reviewed (Toledo-Hernández et al. 2017). For this last species, no study was conducted in the Amazon forest for determining its main pollinators. Both crops (açai and cocoa) presented the highest value of crop pollination service in Pará (Borges et al. 2020), being also dependent on pollinators (Toledo-Hernández et al. 2017, Campbell et al. 2018). Thus, complex pollination systems require caution when being analyzed through pollination syndromes. Future work could emphasize priority edible plant species to be analyzed through detailed fieldwork, cocoa being one of the main priorities.

Protecting local animal diversity is of extreme importance for fruit production, especially in forested habitats. Increasing the knowledge about insects is also a key factor, especially considering their high diversity in tropical habitats and the historical disregarding of their ecological importance. Habitat heterogeneity is key since more heterogeneous environments can support more species through niche partitioning (Tilman 1982, Chesson 2000, Tscharntke et al. 2012, Moreira et al. 2015), and a higher pollinator diversity can directly affect the reproduction of cultivated and wild plants by increasing pollen transfer and fruit and seed production (Kremen et al. 2002, Klein et al. 2003, Hoehn et al. 2008, Garibaldi et al. 2013). Restoration of degraded land programs, especially on the region of Amazon Arc of Deforestation (south and eastern Amazon), can also benefit from a rich diversity of native plant species, and the list provided here is particularly useful for agroforestry projects aiming to associate restoration with sustainable development (Garrity 2004).

We conclude that the Amazon plant species that produce edible fruits are pollinated mainly by bees, especially stingless bees, but other insects are also important, such as beetles and moths. Animal pollinators underpin food security in traditional communities in the Amazon forest and should be protected. There are still few studies on the reproductive biology of edible plant species, and this knowledge is essential for understanding the level of dependence of plants on their pollinators and for helping on decision-making processes for pollinator protection and sustainability.

## Supplementary Data

Supplementary data are available at *Journal of Economic Entomology* online.

## Acknowledgments

We acknowledge the support of the Pará Research Foundation (FAPESPA/ICAAF 019/2016 and 014/2017) and the Brazilian National Council for Scientific and Technological Development (CNPq 300464/2016-9). We thank Marcia M. Maués, Alistair John Campbell, and Rafael Cabral Borges for providing suggestions on the manuscript. We also thank Alistair John Campbell, Cristiano Menezes, João Rosa, Marcia M. Maués and Maria de Lourdes Giannini for the photos provided.

## References Cited

- Athayde, S., J. R. Stepp, and W. C. Ballester. 2016. Engaging indigenous and academic knowledge on bees in the Amazon: implications for environmental management and transdisciplinary research. *J. Ethnobiol. Ethnomed.* 12: 26.
- Bawa, K. S. 1990. Plant-pollinator interactions in tropical rain forests. *Annu. Rev. Ecol. Syst.* 21: 399–422.
- Bernhardt, P. 2000. Convergent evolution and adaptive radiation of beetle pollinated angiosperms. *Plant Sys. Evol.* 222: 293–320.
- Borges, R. C., R. M. Brito, V. L. Imperatriz-Fonseca, and T. C. Giannini. 2020. The Value of crop production and pollination services in the eastern Amazon. *Neotrop. Entomol.* 49: 545–556.
- Brown, J. C., D. Mayes, and C. Bhatta. 2016. Observations of Africanized honey bee *Apis mellifera scutellata* absence and presence within and outside forests across Rondonia, Brazil. *Insectes Soc.* 63: 603–607.
- Buchmann, S. L., and G. P. Nabhan. 1997. *The Forgotten Pollinators*. Island Press, Washington, DC, USA.
- Campbell, A. J., L. G. Carvalheiro, M. M. Maués, R. Jaffé, T. C. Giannini, M. A. B. Freitas, B. W. T. Coelho, and C. Menezes. 2018. Anthropogenic disturbance of tropical forests threatens pollination services to açai palm in the Amazon river delta. *J. Appl. Ecol.* 55: 1725–1736.
- Carson, R. 1962. *Silent Spring*. Houghton Mifflin, Cambridge, MA, USA.
- Cavalcante, P. B. 1996. *Frutas comestíveis da Amazônia*. MPEG, Belém, Brazil.
- Cavalcante, M. C., L. Galetto, M. M. Maués, A. J. S. Pacheco, and I. G. A. Bomfim. 2018. Nectar production dynamics and daily pattern of pollinator visits in Brazil nut (*Bertholletia excelsa* Bonpl.) plantations in Central Amazon: implications for fruit production. *Apidologie* 49: 505–516.
- Chesson, P. 2000. Mechanisms of maintenance of species diversity. *Annu. Rev. Ecol. Evol. Syst.* 31: 343–366.
- Clement, C. R., C. H. Müller, and W. B. C. Flores. 1982. Recursos genéticos de espécies frutíferas nativas da Amazônia Brasileira. *Acta Amazonica* 12: 677–695.
- Cortés-Flores, J., K. B. Hernández-Esquivel, A. González-Rodríguez, and G. Ibarra-Manríquez. 2017. Flowering phenology, growth forms, and pollination syndromes in tropical dry forest species: influence of phylogeny and abiotic factors. *Am. J. Bot.* 104: 39–49.
- Costanza R., R. d'Arge, R. de Groot, S. Farber, M. Grasso, B. Hannon, K. Limburg, S. Naeem, R. V. O'Neill, J. Paruelo, et al. 1997. The value of the world's ecosystem services and natural capital. *Nature* 387: 253–260.
- Costanza R., R. Groot, P. Sutton, S. van der Ploeg, S. J. Anderson, I. Kubiszewski, S. Farber, and R. K. Turner. 2014. Changes in the global value of ecosystem services. *Global Environ. Change* 26: 152–158.
- Dalsgaard B., A. M. M. Gonzalez, J. M. Olesen, A. Timmermann, L. H. Andersen, and J. Ollerton. 2008. Pollination networks and functional specialization: a test using Lesser Antillean plant-hummingbird assemblages. *Oikos* 117: 789–793.
- Díaz, S., U. Pascual, M. Stenseke, B. Martín-López, R. T. Watson, Z. Molnár, R. Hill, K. M. A. Chan, I. A. Baste, K. A. Brauman, et al. 2018. Assessing nature's contributions to people. *Science*. 359: 270–272.

- Dick, C. W., G. Etchelecu, and F. Austerlitz. 2003. Pollen dispersal of tropical trees (*Dimizia excelsa*: Fabaceae) by native insects and African honeybees in pristine and fragmented Amazonian rainforest. *Mol. Ecol.* 12: 753–764.
- Faegri, K., and L. van der Pijl. 1979. The principles of pollination ecology. Pergamon Oxford, Oxford, UK.
- Fenster, C. B., W. S. Armbruster, P. Wilson, M. R. Dudash, and J. D. Thomsom. 2004. Pollination syndromes and floral specialization. *Annu. Rev. Ecol. Evol. Syst.* 35: 375–403.
- Garibaldi, L. A., I. Steffan-Dewenter, R. Winfree, M. A. Aizen, R. Bommarco, S. A. Cunningham, C. Kremen, L. G. Carvalheiro, L. D. Harder, O. Afik, et al. 2013. Wild pollinators enhance fruit set of crops regardless of honey bee abundance. *Science.* 339: 1608–1611.
- Garibaldi, L. A., L. G. Carvalheiro, B. E. Vaissière, B. Gemmill-Herren, J. Hipólito, B. M. Freitas, H. T. Ngo, N. Azzu, A. Sáez, J. Åström, et al. 2016. Mutually beneficial pollinator diversity and crop yield outcomes in small and large farms. *Science.* 351: 388–391.
- Garrity, D. P. 2004. Agroforestry and the achievement of the Millennium Development Goals. *Agroforest Syst.* 61: 5–17.
- Giacometti, D. C. 1993. Recursos genéticos de fruteiras nativas do Brasil, pp. 13–27. In SIMPOSIO NACIONAL DE RECURSOS GENETICOS DE FRUTEIRAS NATIVAS, Cruz das Almas, BA. Anais. Cruz das Almas, BA: EMBRAPA-CNPMP, 1993.
- Giannini, T. C., S. Boff, G. D. Cordeiro, E. A. Cartolano Jr., A. K. Veiga, V. L. Imperatriz-Fonseca, and A. M. Saraiva. 2015a. Crop pollinators in Brazil: a review of reported interactions. *Apidologie* 46: 209–223.
- Giannini, T. C., G. D. Cordeiro, B. M. Freitas, A. M. Saraiva, and V. L. Imperatriz-Fonseca. 2015b. The dependence of crops for pollinators and the economic value of pollination in Brazil. *J. Econ. Entomol.* 108: 849–857.
- Giannini, T. C., W. F. Costa, G. D. Cordeiro, V. L. Imperatriz-Fonseca, A. M. Saraiva, J. Biesmeijer, and L. A. Garibaldi. 2017. Projected climate change threatens pollinators and crop production in Brazil. *PLoS One* 12: e0182274.
- Giannini, T. C., D. A. Alves, R. Alves, G. D. Cordeiro, A. J. Campbell, M. Awade, J. M. S. Bento, A. M. Saraiva, and V. L. Imperatriz-Fonseca. 2020a. Unveiling the contribution of bee pollinators to Brazilian crops with implications for bee management. *Apidologie* 51: 406–421. doi:10.1007/s13592-019-00727-3
- Giannini, T. C., W. F. Costa, R. C. Borges, L. Miranda, C. P. W. Costa, A. M. Saraiva, and V. L. Imperatriz-Fonseca. 2020b. Climate change in the Eastern Amazon: crop-pollinator and occurrence-restricted bees are potentially more affected. *Reg. Environ. Change* 20: 9. doi:10.1007/s10113-020-01611-y
- Girão, L. C., A. V. Lopes, M. Tabarelli, and E. M. Bruna. 2007. Changes in tree reproductive traits reduce functional diversity in a fragmented Atlantic forest landscape. *PLoS One* 2: e908.
- Gomes, V. H. F., I. C. G. Vieira, R. P. Salomão, H. Steege. 2019. Amazonian tree species threatened by deforestation and climate change. *Nat. Clim. Change* 9: 547–553.
- Gottsberger, G. 1986. Some pollination strategies in neotropical savannas and forests. *Plant Sys. Evol.* 152: 29–45.
- Gottsberger, G. 1990. Flowers and beetles in the South American tropics. *Botanica Acta* 103: 360–365.
- Hill R, G. Nates-Parra, J. J. G. Quezada-Euán, D. Buchori, G. LeBuhn, M. M. Maués, P. L. Pert, P. K. Kwapong, S. Saeed, S. J. Breslow, et al. 2019. Biocultural approaches to pollinator conservation. *Nat. Sustainability* 2: 214–222.
- Hoehn, P., T. Tschamtkke, J. M. Tylianakis, and I. Steffan-Dewenter. 2008. Functional group diversity of bee pollinators increases crop yield. *Proc. Biol. Sci.* 275: 2283–2291.
- IPBES. 2016. Summary for policymakers of the assessment report of the Intergovernmental Science-Policy Platform on Biodiversity and Ecosystem Services on pollinators pollination and food production. IPBES, Bonn, Germany.
- Johnson, S. D., and P. Wester. 2017. Stefan Vogel's analysis of floral syndromes in the South African flora: an appraisal based on 60 years of pollination studies. *Flora* 232: 200–206.
- Kainer, K. A., L. H. O. Wadt, and C. L. Staudhammer. 2018. The evolving role of *Bertholletia excelsa* in Amazonia: contributing to local livelihoods and forest conservation. *Desenvolvimento e Meio Ambiente* 48: 477–497.
- Kinoshita, L. S., R. B. Torres, E. R. Forni-Martins, T. Spinelli, Y. J. Ahn, and S. S. Constância. 2006. Composição florística e síndromes de polinização e de dispersão da mata do Sítio São Francisco Campinas SP Brasil. *Acta Botanica Brasílica* 20: 313–327.
- Klein, A. M., I. Steffan-Dewenter, and T. Tschamtkke. 2003. Fruit set of highland coffee increases with the diversity of pollinating bees. *Proc. Biol. Sci.* 270: 955–961.
- Klein, A. M., B. E. Vaissière, J. H. Cane, I. Steffan-Dewenter, S. A. Cunningham, C. Kremen, and T. Tschamtkke. 2007. Importance of pollinators in changing landscapes for world crops. *Proc. Biol. Sci.* 274: 303–313.
- Kremen, C., N. M. Williams, and R. W. Thorp. 2002. Crop pollination from native bees at risk from agricultural intensification. *PNAS* 26: 16813.
- Lichtenberg, E. M., C. D. Mendenhall, and B. Brosi. 2017. Foraging traits modulate stingless bee community disassembly under forest loss. *J. Anim. Ecol.* 86: 1404–1416.
- Machado, I. C., and A. V. Lopes. 2004. Floral traits and pollination systems in the Caatinga, a Brazilian tropical dry forest. *Ann. Bot.* 94: 365–376.
- Machado, I. C., and A. V. Lopes. 2008. Recursos Florais e sistemas de polinização e sexuais em caatinga. In I. R. Leal, M. Tabarelli, and J. M. C. Silva (eds.), *Ecologia e Conservação da Caatinga*. UFPE. Recife, Brazil.
- Maia, A. C. D., C. Schindwein, D. M. A. F. Navarro, and M. Gibernau. 2010. Pollination of *Philodendron acutatum* (Araceae) in the Atlantic Forest of northeastern Brazil: a single scarab beetle species guarantees high fruit set. *Int. J. Plant Sci.* 171: 740–748.
- Maia, A. C. D., M. Gibernau, A. T. Carvalho, E. G. Gonçalves, and C. Schindwein. 2013. The cowl does not make the monk: scarab beetle pollination of the Neotropical aroid *Taccarum ulei* (Araceae Spathicarpeae). *Biol. J. Linn. Soc.* 108: 22–34.
- Martins, R., and Y. Antonini. 2016. Can pollination syndromes indicate ecological restoration success in tropical forests? *Restor. Ecol.* 24: 373–380.
- Montgomery, A., R. R. Dunn, R. Fox, E. Jongejans, S. R. Leather, M. E. Saunders, C. R. Shortall, M. W. Tingley, and D. L. Wagner. 2020. Is the insect apocalypse upon us? How to find out. *Biol. Conserv.* 241: 108327.
- Moreira, E. F., D. Boscolo, and B. F. Viana. 2015. Spatial heterogeneity regulates plant-pollinator networks across multiple landscape scales. *PLoS One* 10: e0123628.
- Moure, J. S., D. Urban, and G. A. R. Melo. 2007. Catalogue of Bees (Hymenoptera, Apoidea) in the Neotropical Region. Curitiba, Sociedade Brasileira de Entomologia. 1058p.
- Nobre, C. A., G. Sampaio, L. S. Borma, J. C. Castilla-Rubio, J. S. Silva, and M. Cardoso. 2016. Land-use and climate change risks in the Amazon and the need of a novel sustainable development paradigm. *Proc. Natl. Acad. Sci. USA* 113: 10759–10768.
- Oliveira, M. S. P. D., G. Couturier, and P. Beserra. 2003. Biologia da polinização da palmeira tucumã (*Astrocaryum vulgare* Mart.) em Belém. *Acta Botanica Brasílica* 17:343–353.
- Ollerton, J., R. Winfree, and S. Tarrant. 2011. How many flowering plants are pollinated by animals? *Oikos* 120: 321–326.
- Paiva, P. F. P. R., M. L. P. Ruivo, O. M. Silva Jr, M. N. M. Maciel, T. G. M. Braga, M. M. N. Andrade, P. C. Santos Jr, E. S. Rocha, T. P. M. Freitas, T. V. S. Leite, et al. (2020) Deforestation in protect areas in the Amazon: a threat to biodiversity. *Biodivers. Conserv.* 29: 19–38.
- Pedro, S. R. M. 2014. The stingless bee fauna in Brazil (Hymenoptera: Apidae). *Sociobiology* 61: 348–354.
- Pinton, F., and L. Emperaire. 2004. Agrobiodiversidade e agricultura tradicional na Amazônia: que perspectiva?, pp. 73–100. In D. Sayago, J. F. Tourand and M. Bursztin (orgs.). *Amazônia: cenas e cenários*. UnB. Brasília.
- Posey, D. A. 1985. Indigenous management of tropical forest ecosystems: the case of the Kayapó indians of the Brazilian Amazon. *Agroforest Syst.* 3: 139–158.

- Posey, D. A., and J. M. F. Camargo. 1985. Additional notes in the classification and knowledge of stingless bees (Meliponinae, Apidae, Hymenoptera) by the Kayapo Indians of Gorotire (Pará, Brazil). *Annals of the Carnegie Museum* 54: 247–274.
- Potts, S. G., J. C. Biesmeijer, C. Kremen, P. Neumann, O. Schweiger, and W. E. Kunin. 2010. Global pollinator declines: trends, impacts and drivers. *Trends Ecol. Evol.* 25: 345–353.
- Potts, S. G., V. Imperatriz-Fonseca, H. T. Ngo, M. A. Aizen, J. C. Biesmeijer, T. D. Breeze, L. V. Dicks, L. A. Garibaldi, R. Hill, J. Settele, *et al.* 2016. Safeguarding pollinators and their values to human well-being. *Nature* 540: 220–229.
- Proctor, M., P. Yeo, and A. Lack. 1996. *The natural history of pollination*. Harper Collins, London, UK.
- Quintero, E., E. Genzoni, N. Mann, C. Nuttman, and B. Anderson. 2017. Sunbird surprise: a test of the predictive power of the syndrome concept. *Flora* 232: 22–29.
- Rader, R., I. Bartomeus, L. A. Garibaldi, M. P. Garratt, B. G. Howlett, R. Winfree, S. A. Cunningham, M. M. Mayfield, A. D. Arthur, G. K. Andersson, *et al.* 2016. Non-bee insects are important contributors to global crop pollination. *Proc. Natl. Acad. Sci. USA* 113: 146–151.
- Ramalho, M. 2004. Stingless bees and mass flowering trees in the canopy of Atlantic Forest: a tight relationship. *Acta Botanica Brasílica* 18: 37–47.
- Ricketts, T. H. 2004. Tropical forest fragments enhance pollinator activity in nearby coffee crops. *Conserv. Biol.* 18: 1262–1271.
- Rosas-Guerrero, V., R. Aguilar, S. Martén-Rodríguez, L. Ashworth, M. Lopezaraiza-Mikel, J. M. Bastida, and M. Quesada. 2014. A quantitative review of pollination syndromes: do floral traits predict effective pollinators? *Ecol. Lett.* 17: 388–400.
- Roubik, D. W., and R. Villanueva-Gutierrez. 2009. Invasive Africanized honey bee impact on native solitary bees: a pollen resource and trap nest analysis. *Biol. J. Linn. Soc.* 98: 152–160.
- Silva, S. 2011. *Frutas da Amazônia Brasileira*. Metalivros, São Paulo, Brazil.
- Slaa, E. J., L. A. S. Chaves, and K. S. Malagodi-Braga. 2006. Stingless bees in applied pollination: practice and perspectives. *Apidologie* 37: 293–315.
- Stang, M., P. G. L. Klinkhamer, and E. Van Der Meijden. 2006. Size constraints and flower abundance determine the number of interactions in a plant-flower visitor web. *Oikos* 112: 111–121.
- Tilman, D. 1982. *Resource competition and community structure*. Princeton University Press, NJ, USA.
- Toledo-Hernández, M., T. C. Wanger, and T. Tschardtke. 2017. Neglected pollinators: can enhanced pollination services improve cocoa yields? A review. *Agriculture Ecosystem and Environment* 247: 137–148.
- Tschardtke, T., J. M. Tylianakis, T. A. Rand, R. K. Didham, L. Fahrig, P. Batary, J. Fründ, R. D. Holt, A. Holzschuh, A. M. Klein, *et al.* 2012. Landscape moderation of biodiversity patterns and processes—eight hypotheses. *Biol. Rev.* 87: 661–685.
- Waser, N. W., L. Chittka, M. V. Price, N. M. Williams, and J. Ollerton. 1996. Generalization in pollination systems, and why it matters. *Ecology* 77: 1043–1060.
- Yamamoto, M., C. I. Silva, S. C. Augusto, A. A. A. Barbosa, and P. E. Oliveira. 2012. The role of bee diversity in pollination and fruit set of yellow passion fruit (*Passiflora edulis* forma *flavicarpa* Passifloraceae) crop in Central Brazil. *Apidologie* 43: 515–526.
